# Supplementary material
Source: MDPI journal article supplement (https://www.mdpi.com/2673-7078/1/1/9)
Supplement: s2 [file s2]

Archive with 1 entries (1 files):
- SupplementalData_2.pdf
